# Supplementary material for: The folate cycle enzyme MTHFD2 induces cancer immune evasion through PD-L1 up-regulation
Source: PubMed Central journal article supplement (PMC8007798; doi:10.1038/s41467-021-22173-5), 2021-03-29
Supplement: 41467_2021_22173_MOESM3_ESM.pdf [file 41467_2021_22173_MOESM3_ESM.pdf]

## **Description of Additional Supplementary Files**

**Supplementary Data 1** | The analysis of metabolic CRISPR library screen by MAGeCK

**Supplementary Data 2** | Up-regulated genes in human tumors (cited data)

**Supplementary Data 3** | Altered genes in siMTHFD2 cancer cells in RNA-seq

**Supplementary Data 4** | MTHFD2 correlated genes in TCGA clinical samples (RNASeqV2 syn4976369TGCA)

**Supplementary Data 5** | Metabolomics analysis of siMTHFD2 cancer cells by MS

**Supplementary Data 6** | List of primers used
